# Supplementary material
Source: publisher figshare collection journal article supplement (https://sage.figshare.com/ndownloader/files/12754490)
Supplement: Supplementary file 1 [file 12754490]

| **Supplementary Table A1** Proportions of population age 75 and 90 years by country | | | | | | | | | | | | | | | | | | | | | | | | |  |
| --- | --- | --- | --- | --- | --- | --- | --- | --- | --- | --- | --- | --- | --- | --- | --- | --- | --- | --- | --- | --- | --- | --- | --- | --- | --- |
|  | **1990** | **1991** | **1992** | **1993** | **1994** | **1995** | **1996** | **1997** | **1998** | **1999** | **2000** | **2001** | **2002** | **2003** | **2004** | **2005** | **2006** | **2007** | **2008** | **2009** | **2019** | **2011** | **2012** | **2013** | **2014** |
| **Females** | | | | | | | | | | | | | | | | | | | | | | | | | |
| **75 years** | | | | | | | | | | | | | | | | | | | | | | | | | |
| **Sweden** | 9.8 | 9.9 | 10.0 | 10.0 | 10.0 | 10.3 | 10.5 | 10.6 | 10.7 | 10.8 | 10.8 | 10.8 | 10.8 | 10.7 | 10.7 | 10.7 | 10.6 | 10.5 | 10.4 | 10.2 | 10.1 | 10.1 | 10.0 | 10.0 | 10.0 |
| **Norway** | 8.8 | 8.9 | 9.0 | 9.1 | 9.2 | 9.2 | 9.4 | 9.6 | 9.7 | 9.7 | 9.7 | 9.7 | 9.7 | 9.6 | 9.6 | 9.5 | 9.5 | 9.4 | 9.2 | 9.1 | 8.9 | 8.7 | 8.6 | 8.5 | 8.4 |
| **Iceland** | 5.3 | 5.4 | 5.4 | 5.5 | 5.5 | 5.6 | 5.7 | 5.7 | 5.8 | 5.9 | 5.9 | 6.0 | 6.1 | 6.2 | 6.3 | 6.5 | 6.6 | 6.7 | 6.6 | 6.6 | 6.7 | 6.7 | 6.8 | 6.8 | 6.8 |
| **Denmark** | 8.7 | 8.7 | 8.8 | 8.8 | 8.8 | 8.7 | 8.8 | 8.8 | 8.8 | 8.9 | 8.9 | 8.9 | 8.8 | 8.7 | 8.7 | 8.7 | 8.6 | 8.6 | 8.5 | 8.5 | 8.4 | 8.4 | 8.5 | 8.6 | 8.7 |
| **Finland** | 7.6 | 7.7 | 7.8 | 7.9 | 7.8 | 8.0 | 8.2 | 8.4 | 8.6 | 8.7 | 8.9 | 9.1 | 9.2 | 9.4 | 9.7 | 9.9 | 10.1 | 10.2 | 10.3 | 10.4 | 10.5 | 10.7 | 10.8 | 11.0 | 11.2 |
| **90 years** | | | | | | | | | | | | | | | | | | | | | | | | | |
| **Sweden** | 0.7 | 0.7 | 0.8 | 0.8 | 0.8 | 0.9 | 0.9 | 1.0 | 1.0 | 1.0 | 1.1 | 1.1 | 1.1 | 1.2 | 1.2 | 1.2 | 1.2 | 1.2 | 1.2 | 1.2 | 1.3 | 1.4 | 1.4 | 1.34 | 1.4 |
| **Norway** | 0.6 | 0.7 | 0.7 | 0.7 | 0.7 | 0.7 | 0.8 | 0.8 | 0.8 | 0.8 | 0.8 | 0.9 | 0.9 | 0.9 | 0.9 | 1.0 | 1.0 | 1.0 | 1.1 | 1.1 | 1.1 | 1.2 | 1.2 | 1.2 | 1.2 |
| **Iceland** | 0.5 | 0.5 | 0.5 | 0.5 | 0.5 | 0.5 | 0.6 | 0.5 | 0.5 | 0.5 | 0.5 | 0.5 | 0.6 | 0.6 | 0.6 | 0.6 | 0.6 | 0.6 | 0.6 | 0.6 | 0.6 | 0.7 | 0.7 | 0.7 | 0.8 |
| **Denmark** | 0.6 | 0.7 | 0.7 | 0.7 | 0.7 | 0.8 | 0.8 | 0.8 | 0.8 | 0.8 | 0.9 | 0.9 | 0.9 | 0.9 | 0.9 | 1.0 | 1.0 | 1.0 | 1.0 | 1.0 | 1.0 | 1.0 | 1.1 | 1.1 | 1.1 |
| **Finland** | 0.4 | 0.4 | 0.4 | 0.5 | 0.5 | 0.5 | 0.5 | 0.6 | 0.6 | 0.6 | 0.7 | 0.7 | 0.7 | 0.8 | 0.8 | 0.8 | 0.9 | 0.9 | 0.9 | 0.9 | 1.0 | 1.1 | 1.1 | 1.2 | 1.2 |
| **Males** | | | | | | | | | | | | | | | | | | | | | | | | | |
| **75 years** | | | | | | | | | | | | | | | | | | | | | | | | | |
| **Sweden** | 6.2 | 6.2 | 6.3 | 6.3 | 6.3 | 6.5 | 6.7 | 6.8 | 6.8 | 6.9 | 6.9 | 7.0 | 6.9 | 6.9 | 6.9 | 6.9 | 6.9 | 6.9 | 6.9 | 6.8 | 6.8 | 6.9 | 6.9 | 7.0 | 7.1 |
| **Norway** | 5.2 | 5.3 | 5.3 | 5.4 | 5.4 | 5.4 | 5.6 | 5.7 | 5.7 | 5.8 | 5.8 | 5.8 | 5.8 | 5.8 | 5.8 | 5.8 | 5.8 | 5.8 | 5.8 | 5.7 | 5.6 | 5.6 | 5.5 | 5.5 | 5.5 |
| **Iceland** | 3.7 | 3.7 | 3.7 | 3.7 | 3.8 | 3.8 | 3.9 | 4.0 | 4.1 | 4.1 | 4.2 | 4.2 | 4.3 | 4.5 | 4.6 | 4.7 | 4.7 | 4.7 | 4.7 | 4.8 | 4.9 | 5.0 | 5.0 | 5.2 | 5.2 |
| **Denmark** | 5.1 | 5.1 | 5.2 | 5.2 | 5.1 | 5.1 | 5.2 | 5.2 | 5.2 | 5.2 | 5.2 | 5.3 | 5.3 | 5.3 | 5.3 | 5.3 | 5.4 | 5.4 | 5.4 | 5.5 | 5.5 | 5.6 | 5.7 | 5.9 | 6.1 |
| **Finland** | 3.5 | 3.6 | 3.6 | 3.6 | 3.6 | 3.7 | 3.8 | 3.9 | 4.0 | 4.1 | 4.3 | 4.5 | 4.6 | 4.8 | 5.1 | 5.3 | 5.5 | 5.7 | 5.8 | 6.0 | 6.2 | 6.3 | 6.5 | 6.8 | 7.0 |
| **90 years** | | | | | | | | | | | | | | | | | | | | | | | | | |
| **Sweden** | 0.3 | 0.3 | 0.3 | 0.3 | 0.3 | 0.3 | 0.3 | 0.3 | 0.4 | 0.4 | 0.4 | 0.4 | 0.4 | 0.4 | 0.4 | 0.4 | 0.4 | 0.5 | 0.5 | 0.5 | 0.56 | 0.5 | 0.6 | 0.6 | 0.6 |
| **Norway** | 0.3 | 0.3 | 0.3 | 0.3 | 0.3 | 0.3 | 0.3 | 0.3 | 0.3 | 0.3 | 0.3 | 0.3 | 0.3 | 0.3 | 0.3 | 0.3 | 0.3 | 0.3 | 0.3 | 0.4 | 0.4 | 0.4 | 0.4 | 0.4 | 0.4 |
| **Iceland** | 0.2 | 0.2 | 0.2 | 0.3 | 0.3 | 0.3 | 0.3 | 0.3 | 0.3 | 0.3 | 0.3 | 0.2 | 0.2 | 0.3 | 0.3 | 0.3 | 0.3 | 0.3 | 0.3 | 0.3 | 0.3 | 0.3 | 0.3 | 0.3 | 0.4 |
| **Denmark** | 0.2 | 0.2 | 0.2 | 0.2 | 0.2 | 0.3 | 0.2 | 0.3 | 0.3 | 0.3 | 0.3 | 0.3 | 0.3 | 0.3 | 0.3 | 0.3 | 0.3 | 0.3 | 0.3 | 0.3 | 0.3 | 0.4 | 0.4 | 0.4 | 0.4 |
| **Finland** | 0.1 | 0.1 | 0.1 | 0.1 | 0.1 | 0.1 | 0.2 | 0.2 | 0.2 | 0.2 | 0.2 | 0.2 | 0.2 | 0.2 | 0.2 | 0.2 | 0.2 | 0.2 | 0.2 | 0.3 | 0.3 | 0.3 | 0.3 | 0.4 | 0.4 |
